# Supplementary material for: Synthesis and characterization of the thermodynamic and electrochemical properties of tetra-alkyl phosphonium oxalate ionic liquids
Source: Royal Society of Chemistry journal article supplement (doi:10.1039/c4ra01467g), 2014-01-01
Supplement: c4ra01467g1.pdf [file c4ra01467g1.pdf]

**Synthesis and characterization of the thermodynamic  
and electrochemical properties of tetra-alkyl  
phosphonium oxalate ionic liquids**

Mauricio Quiroz-Guzman, Daniel P. Fagnant Jr, Xiao-Yan  
Chen, Chaojun Shi, Joan F. Brennecke, George S. Goff and  
Wolfgang Runde

Supporting Information

# <sup>1</sup>H NMR

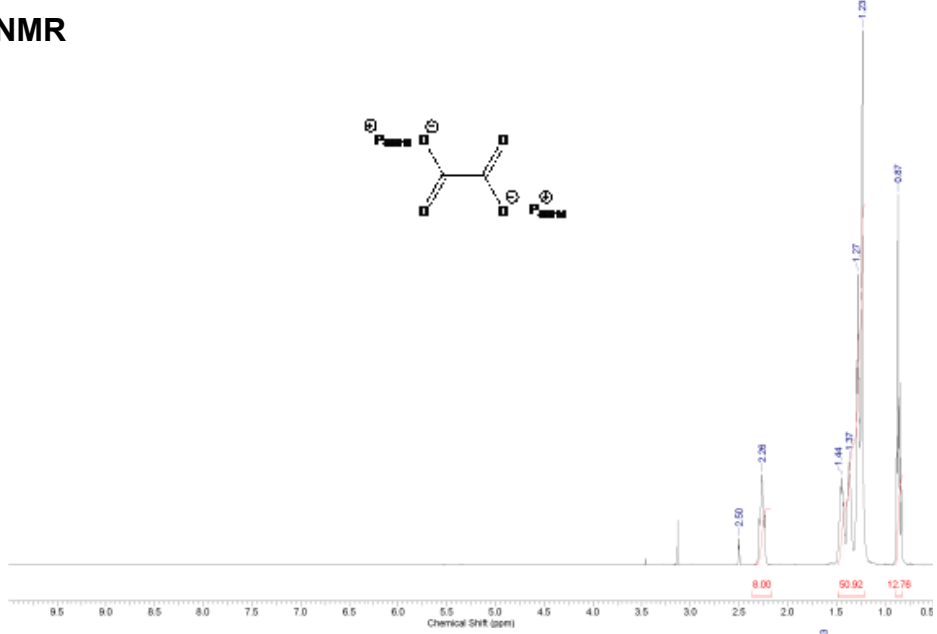

# <sup>13</sup>C NMR

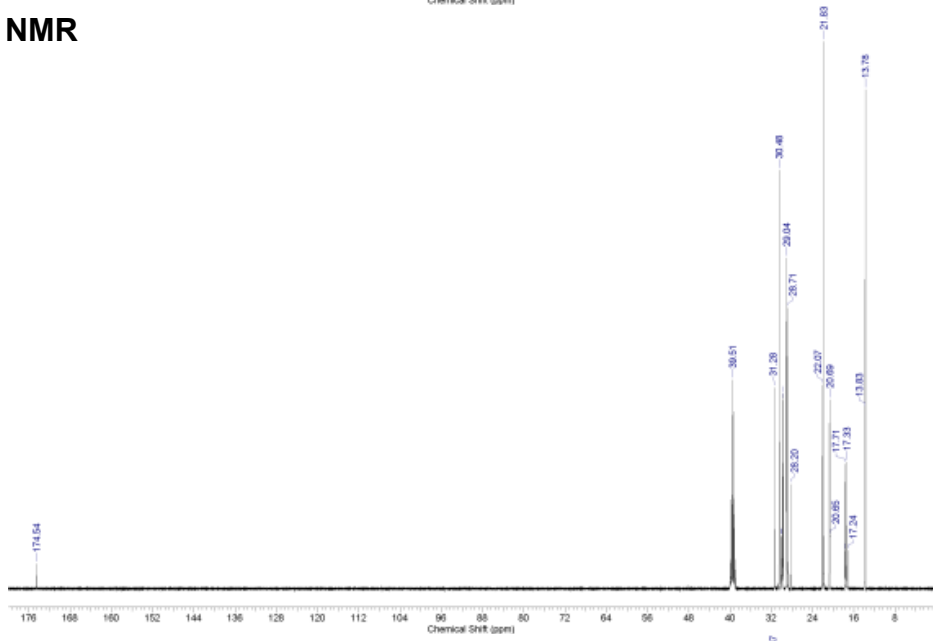

# <sup>31</sup>P NMR

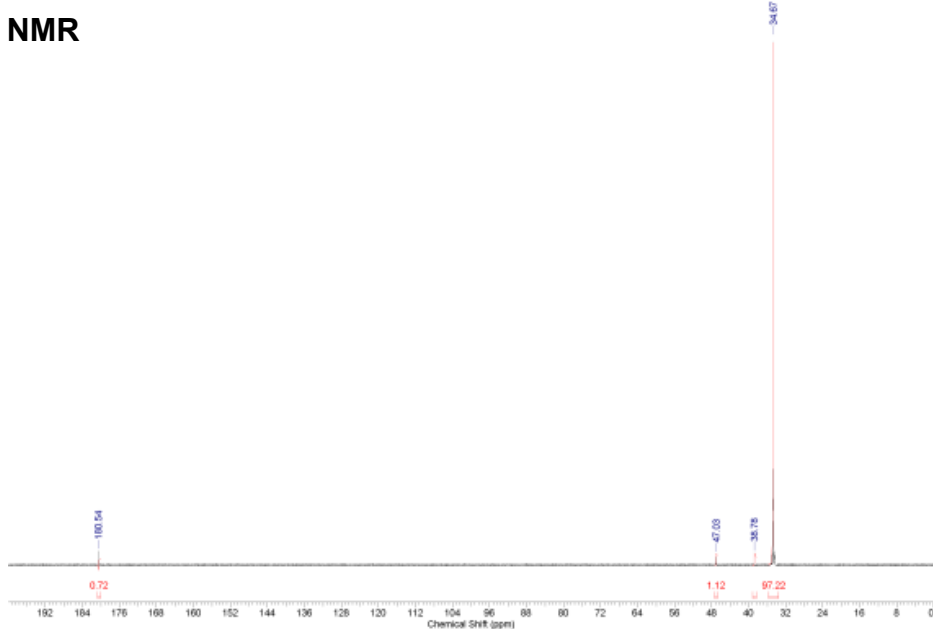

# TGA

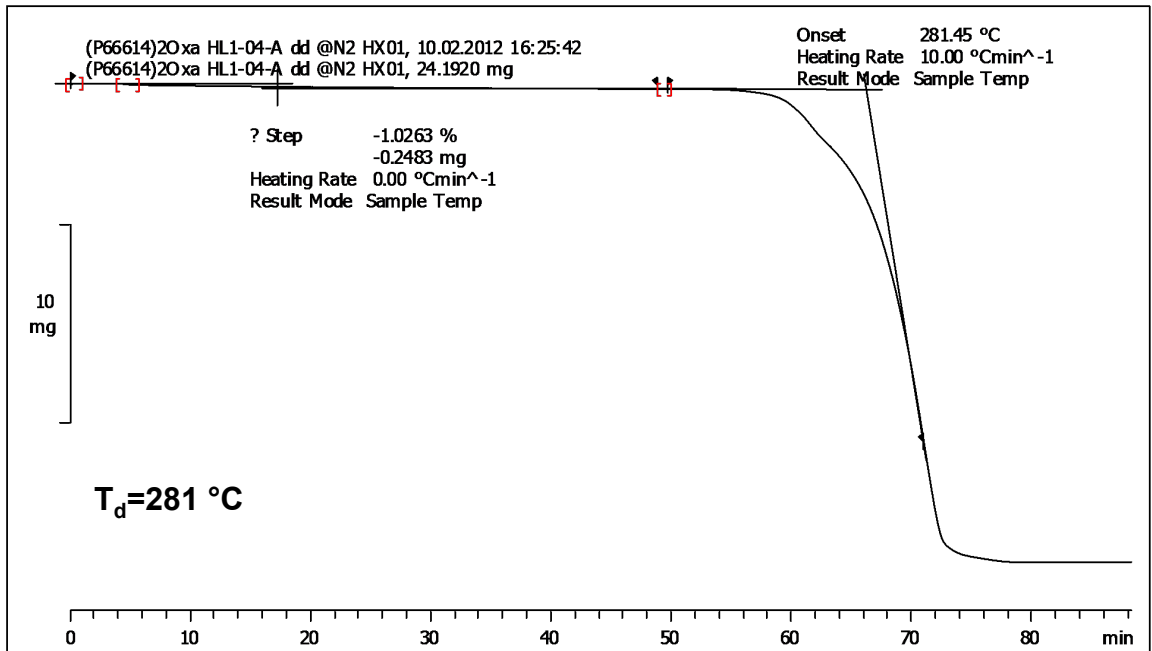

Lab: METTLER

STAR<sup>®</sup> SW 9.10

# DSC

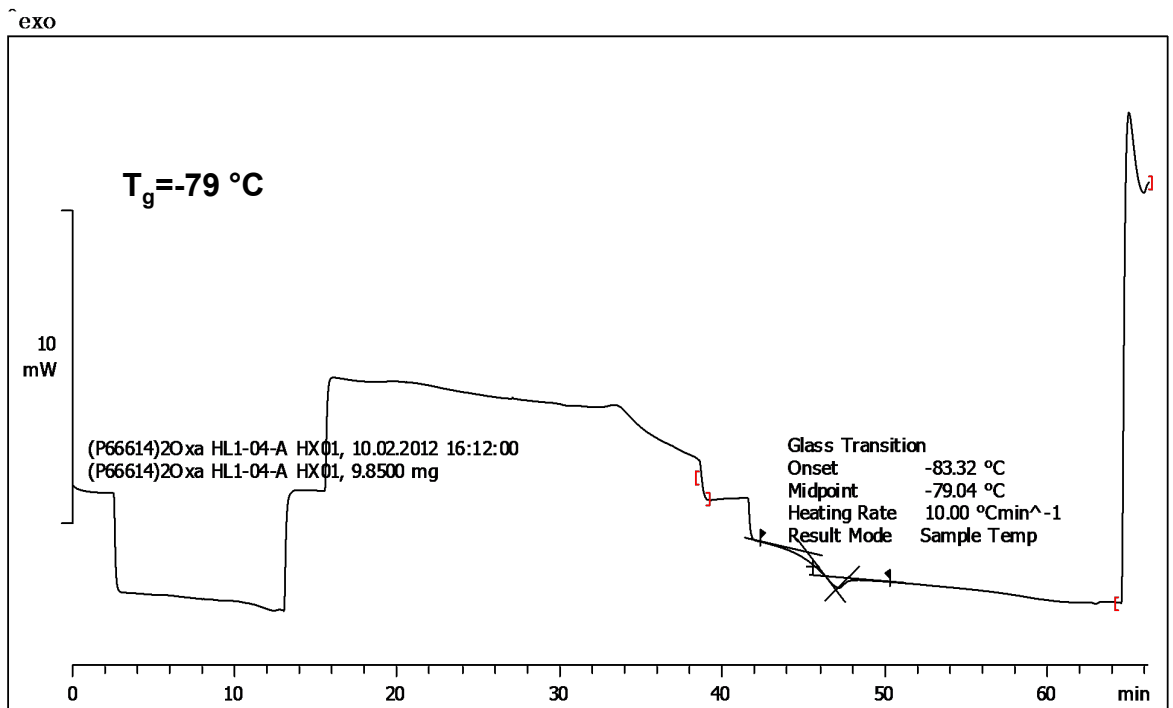

Lab: METTLER

STAR<sup>®</sup> SW 9.10

# <sup>1</sup>H NMR

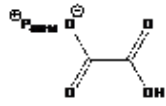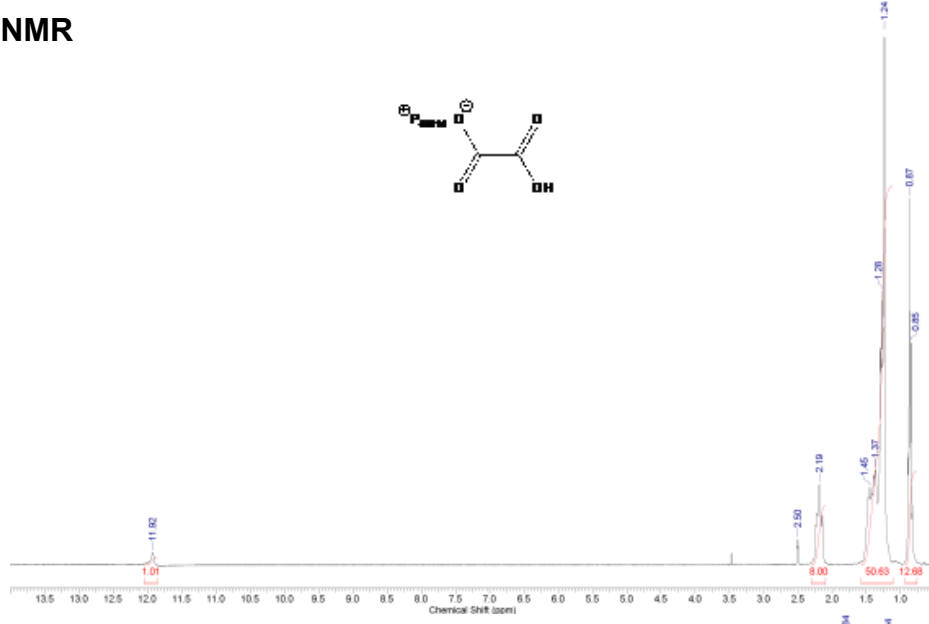

# <sup>13</sup>C NMR

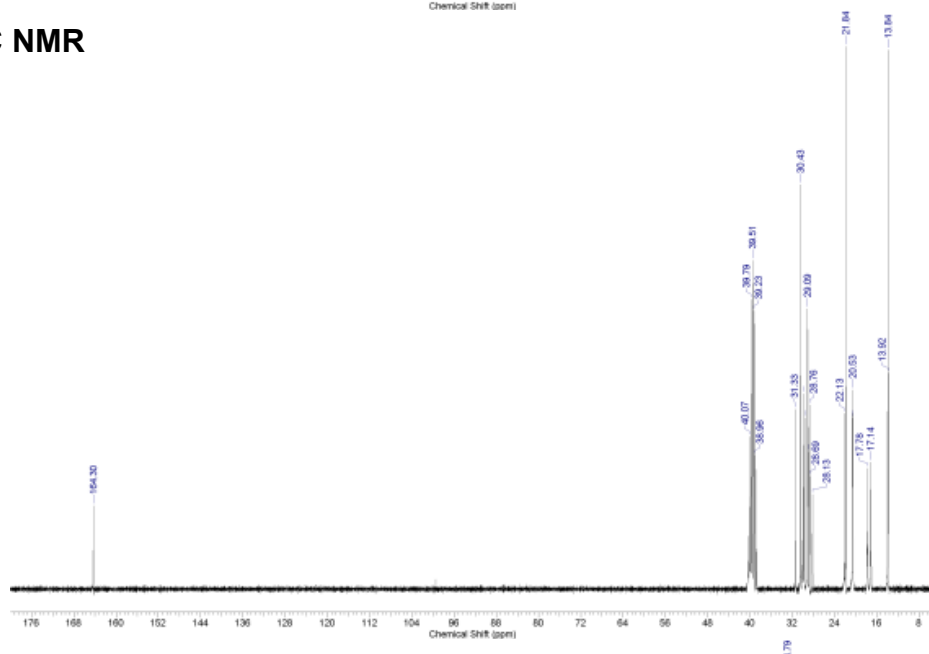

# <sup>31</sup>P NMR

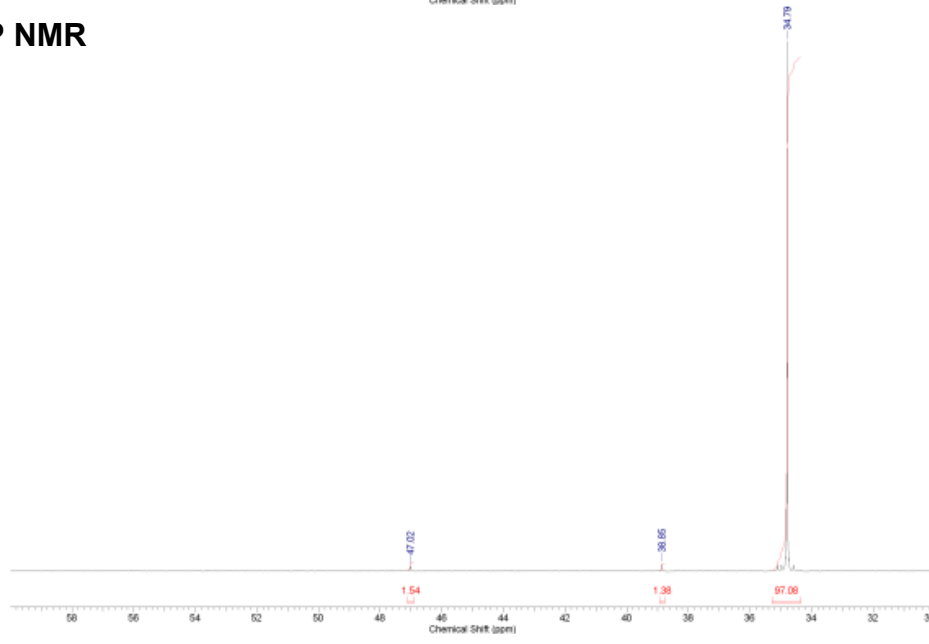

# TGA

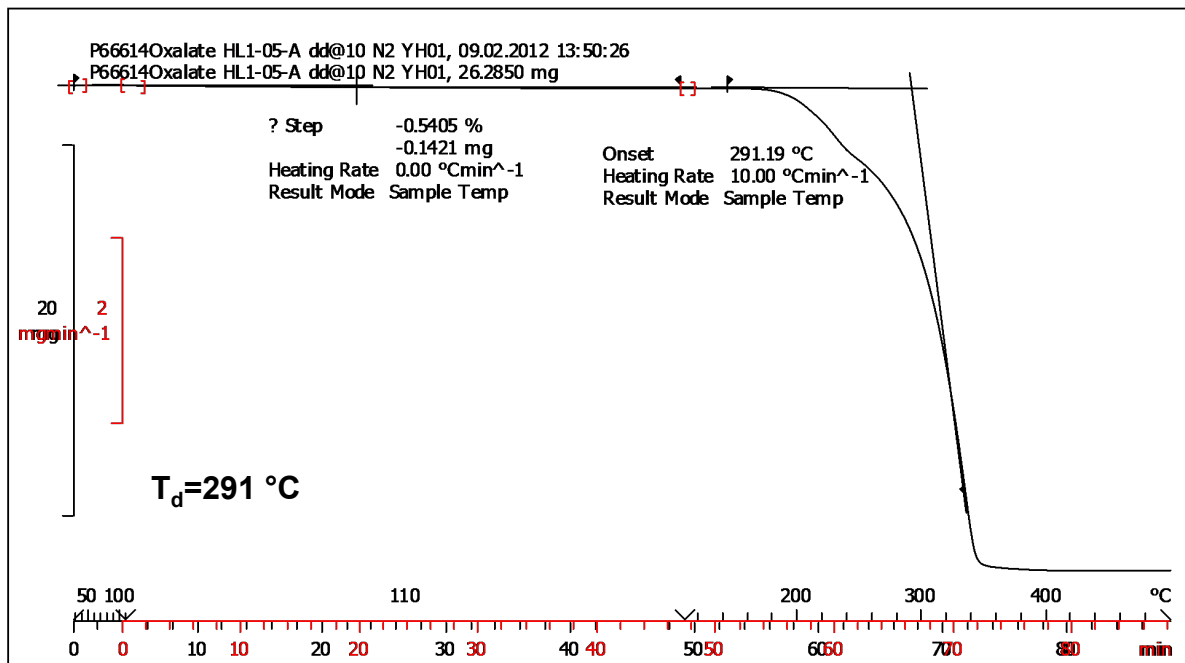

Lab: METTLER

STAR<sup>®</sup> SW 9.10

# DSC

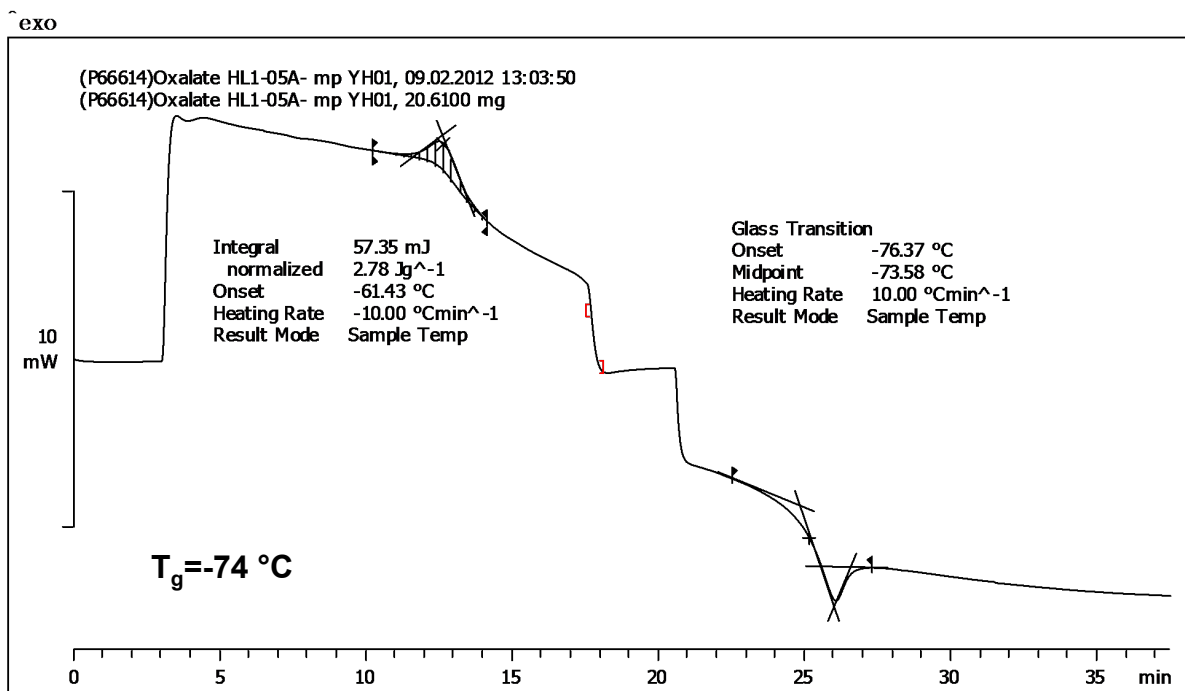

Lab: METTLER

STAR<sup>®</sup> SW 9.10

# <sup>1</sup>H NMR

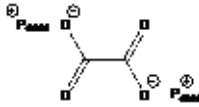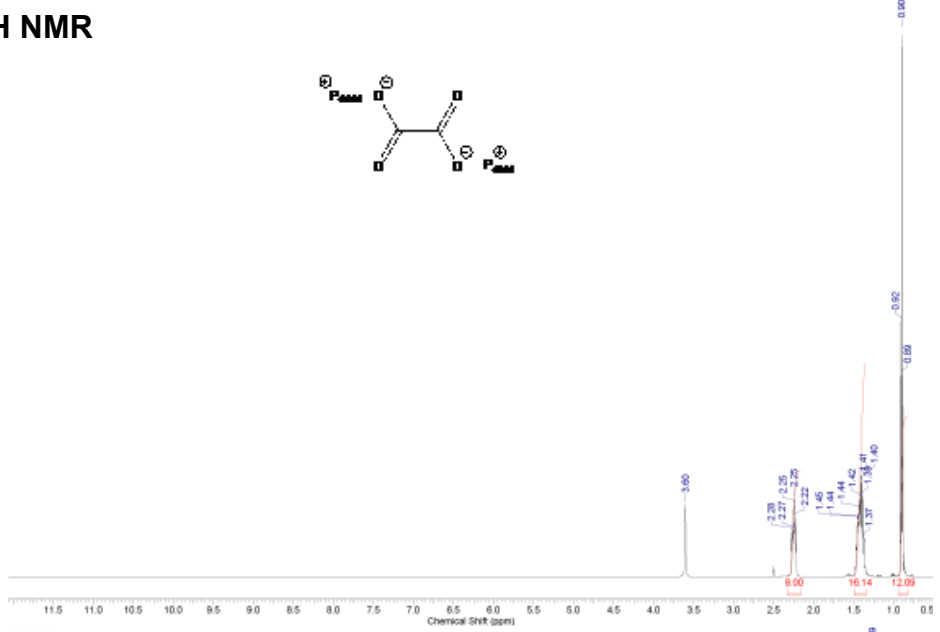

# <sup>13</sup>C NMR

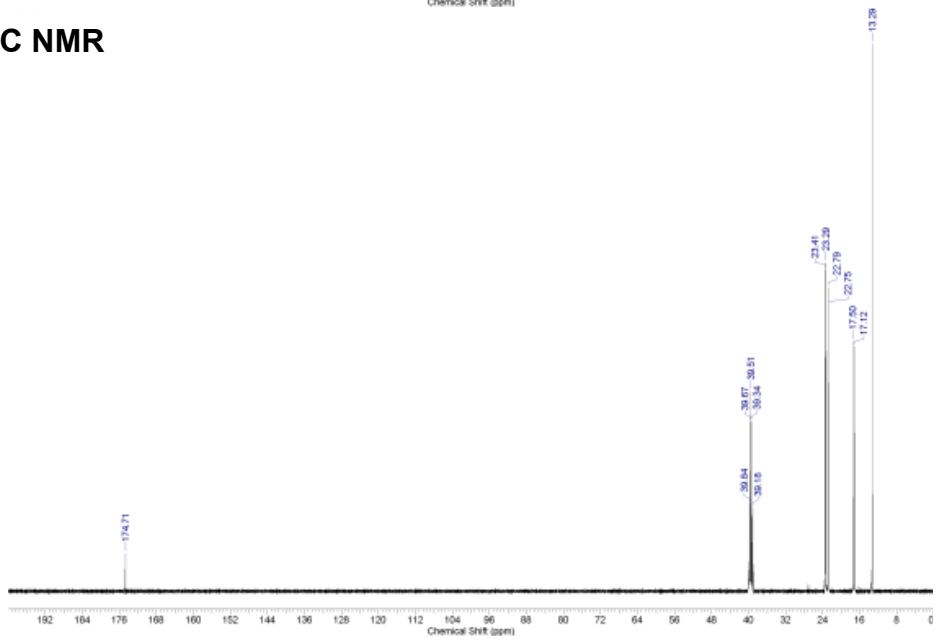

# <sup>31</sup>P NMR

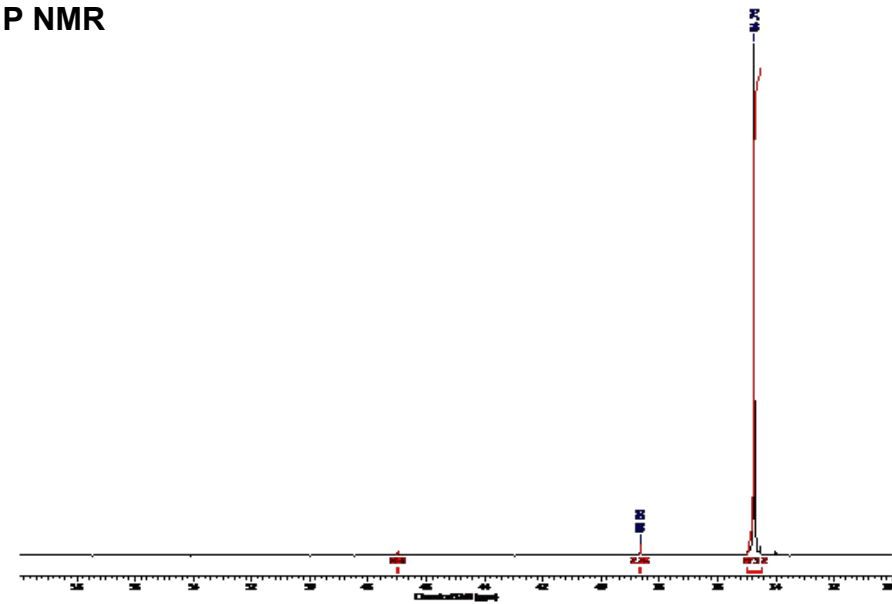

# TGA

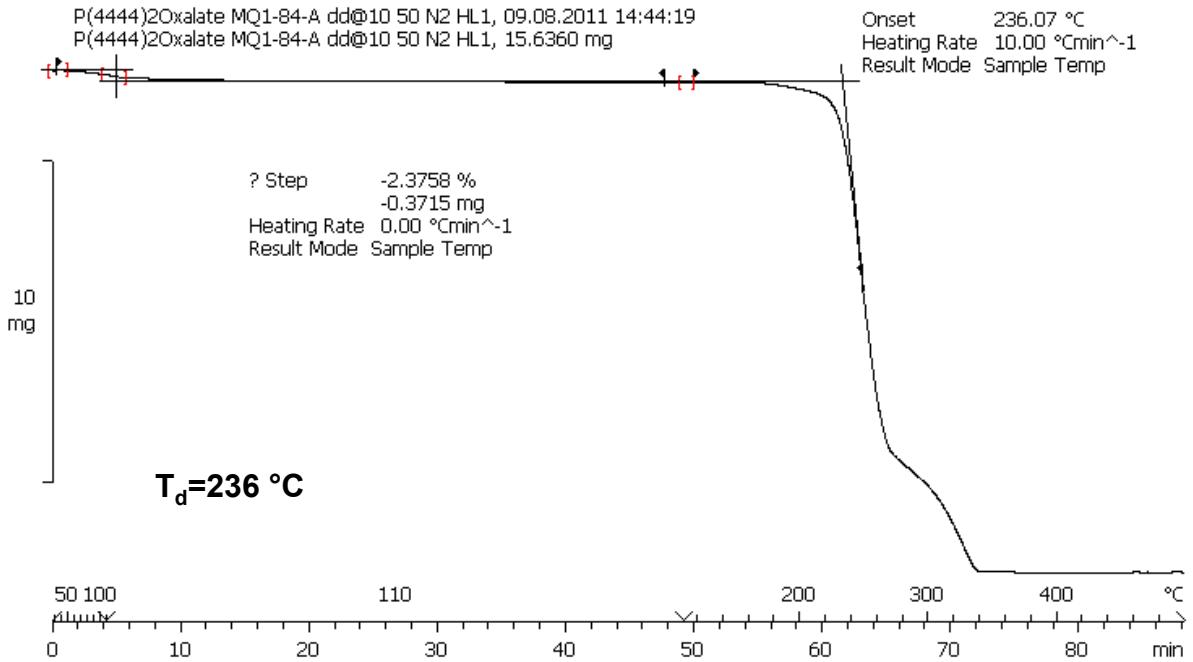

# DSC

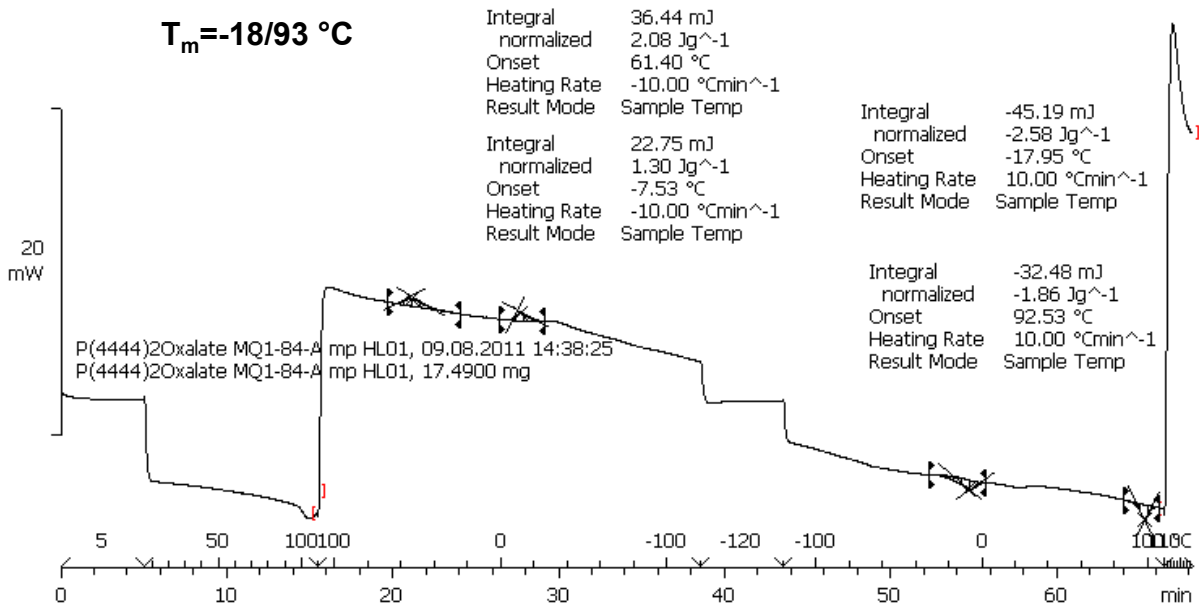

## Raman

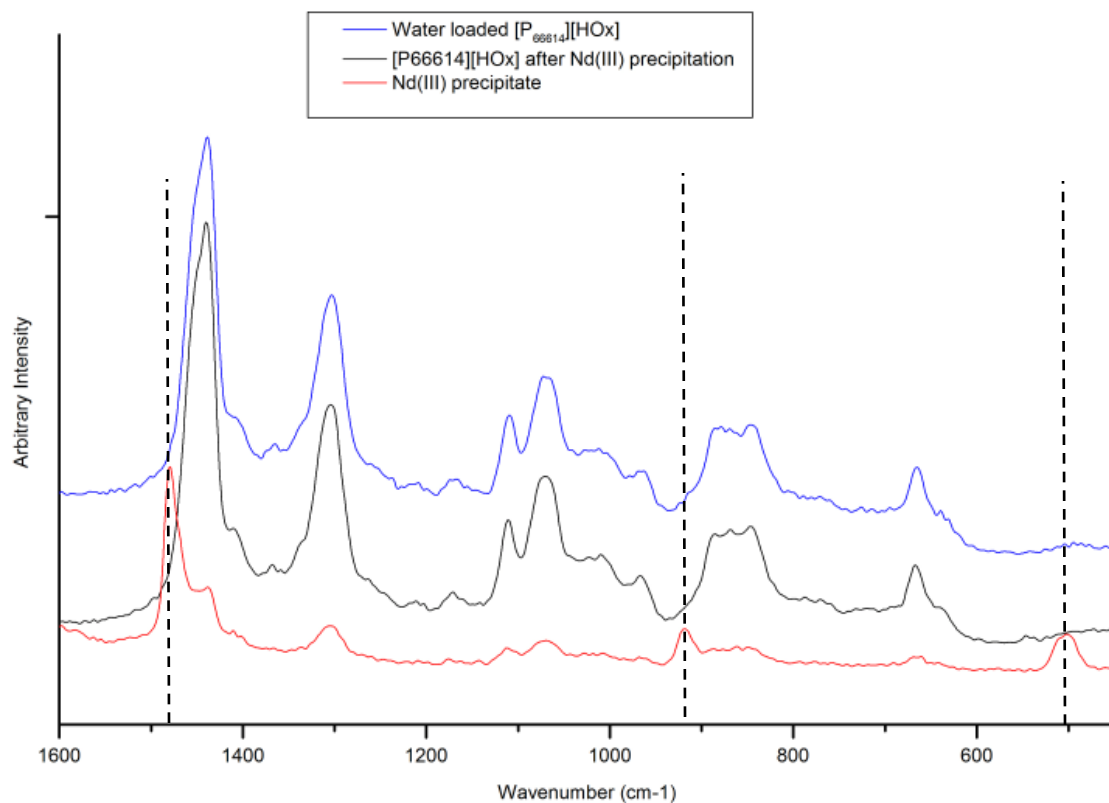

Raman characterization of water loaded [P<sub>66614</sub>][HOx] before and after addition of Nd<sub>2</sub>O<sub>3</sub>. Dotted lines illustrate differences in peak locations for Nd(III)-oxalate solid spectra.



## PXRD

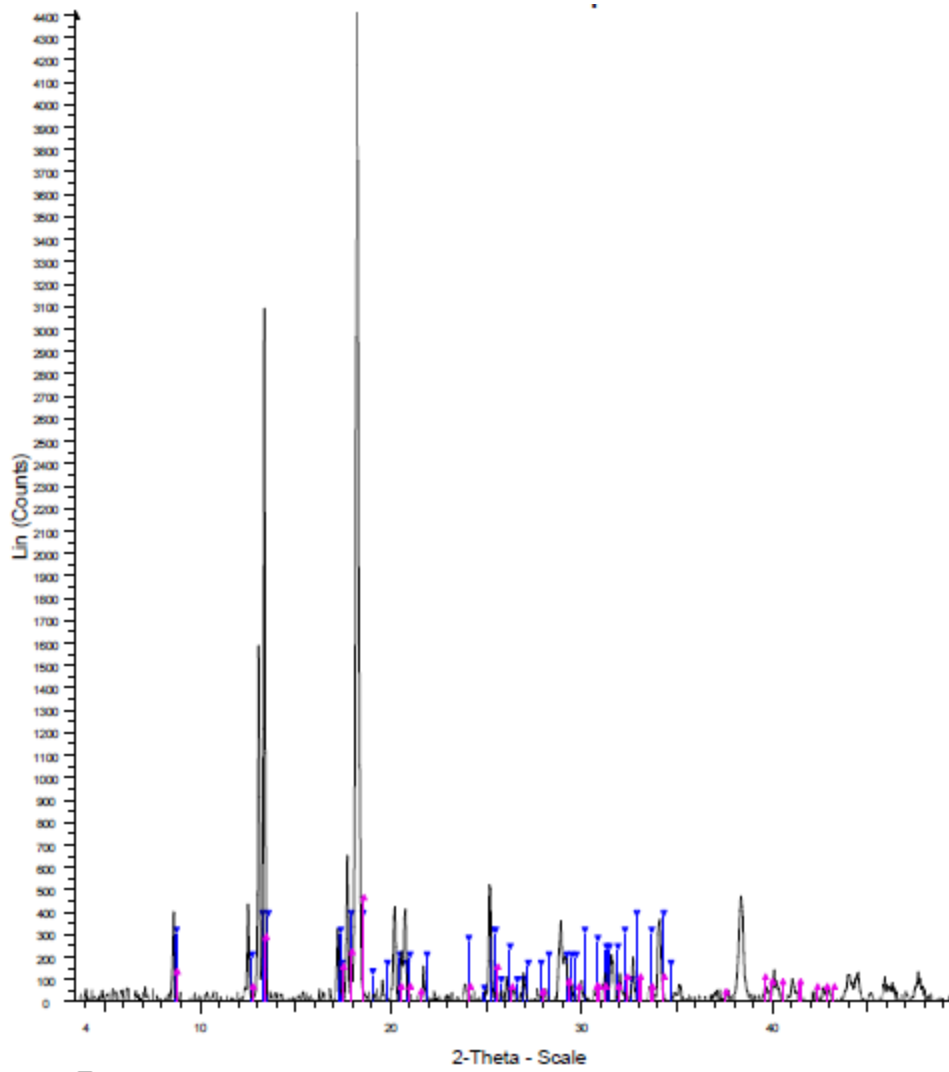

Black lines indicate the powder X-ray diffraction pattern of the solid blue precipitate. Blue and pink lines are neodymium oxalate hydrate reference patterns. The reference peaks are consistent with the precipitate, although they are shifted to slightly higher 2-Theta values, which could be due to irregularity in sample thickness or flatness. The primary peak that cannot be attributed to a neodymium oxalate complex occurs at 37 2-Theta. This peak may be attributed to the presence of the  $[P_{66614}]^+$  cation, for which there is no reference pattern.
